# Supplementary material for: Smoking changes adaptive immunity with persistent effects
Source: PubMed Central journal article supplement (PMC10881394; doi:10.1038/s41586-023-06968-8), 2024-02-14
Supplement: 41586_2023_6968_MOESM1_ESM.pdf [file 41586_2023_6968_MOESM1_ESM.pdf]

**Supplementary information**

---

**Smoking changes adaptive immunity with persistent effects**

---

In the format provided by the authors and unedited

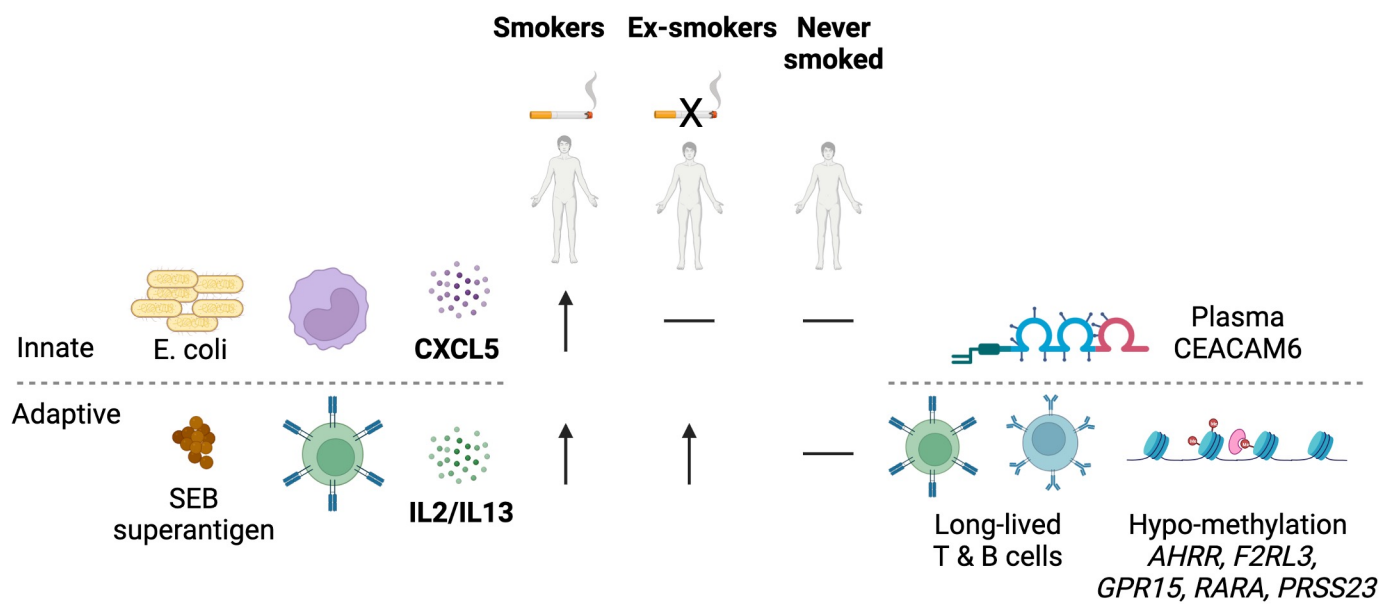

Supplementary Figure 1. Graphical abstract

Graphical abstract of the whole study showing groups of smokers, past-smokers and never-smokers and their associated features: CXCL5 is more induced in smokers compared to past-smokers and never-smokers upon innate stimulation, such as with E.coli, and this could be mediated through higher plasma levels of CEACAM6; whereas IL2 and IL13 are more induced in smokers and past-smokers compared to non-smokers upon adaptive immune stimulation, such as with SEB, and this could be mediated through memory T and B cells and hypo-methylation of signal transactivators and metabolism regulator genes (AHRR, F2RL3, GPR15, RARA, PRSS23).
